# Supplementary material
Source: PubMed Central journal article supplement (PMC4419752)

**A**

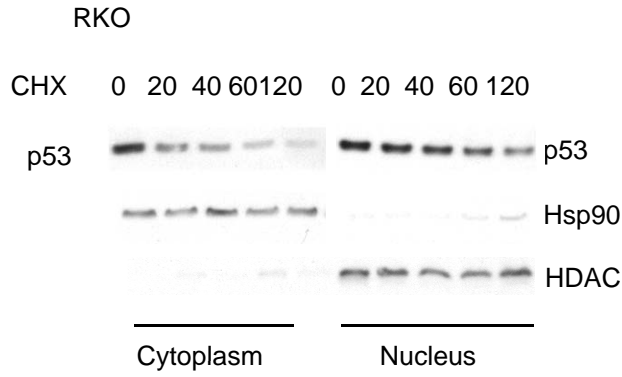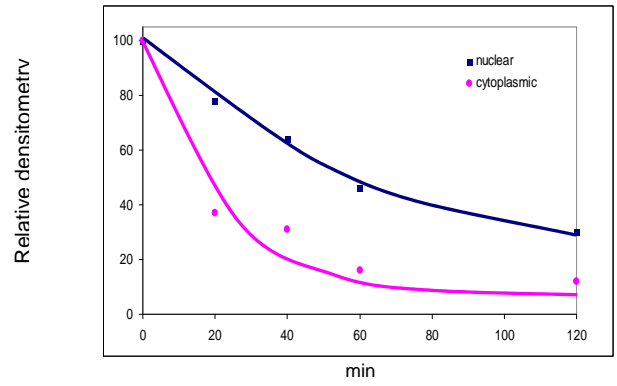

**B**

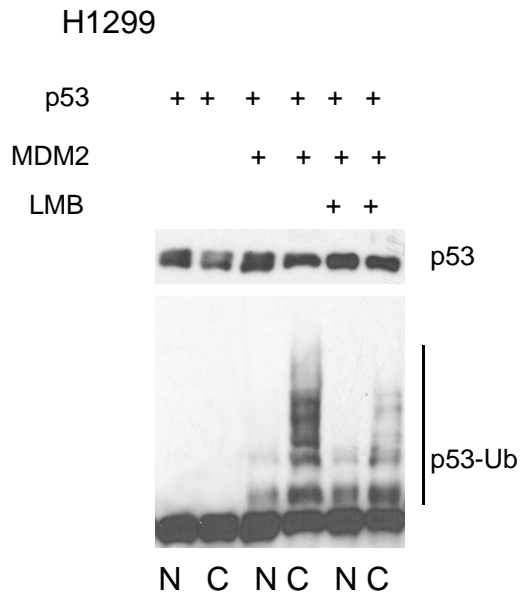

**C**

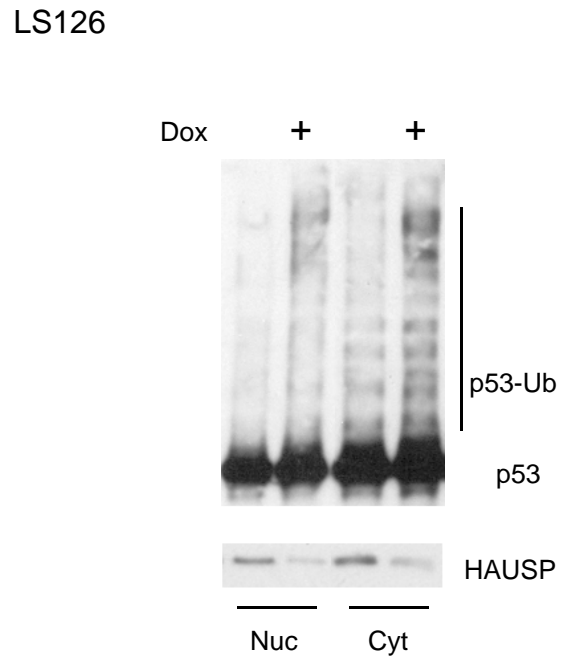

**D**

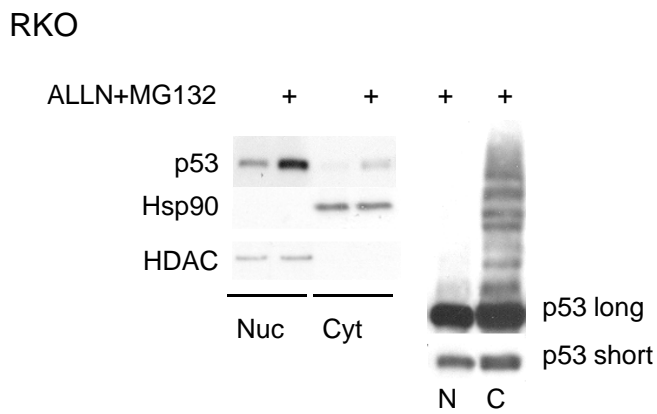

A

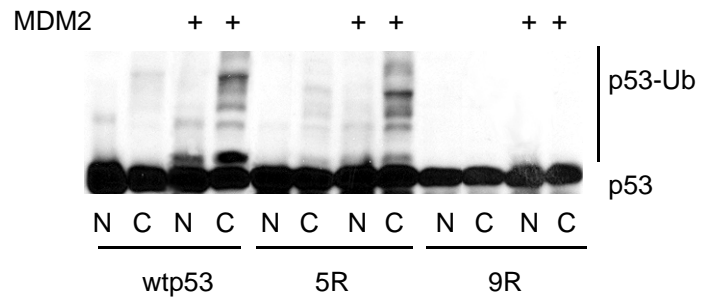

B

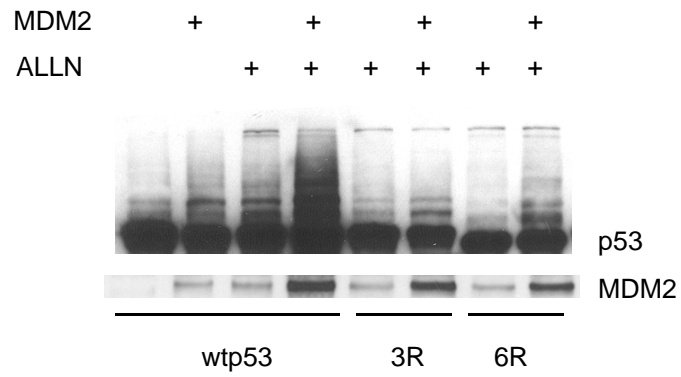

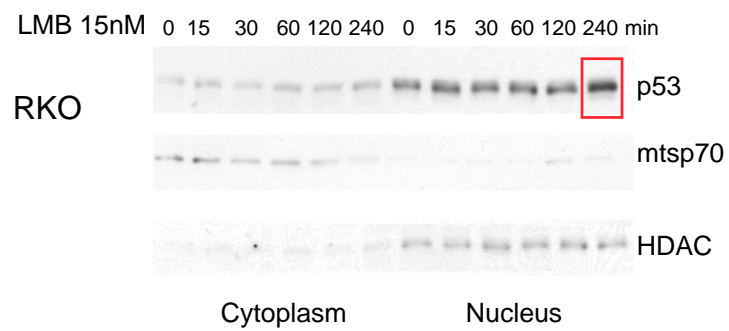

Suppl. Figure 3

Supplement: NIHMS653810-supplement-Supplementary_figures.pdf [file NIHMS653810-supplement-Supplementary_figures.pdf]
